# Supplementary material
Source: PubMed Central journal article supplement (PMC3766279)
Supplement: supp_cwt051_cwt051supp.pdf [file supp_cwt051_cwt051supp.pdf]

A

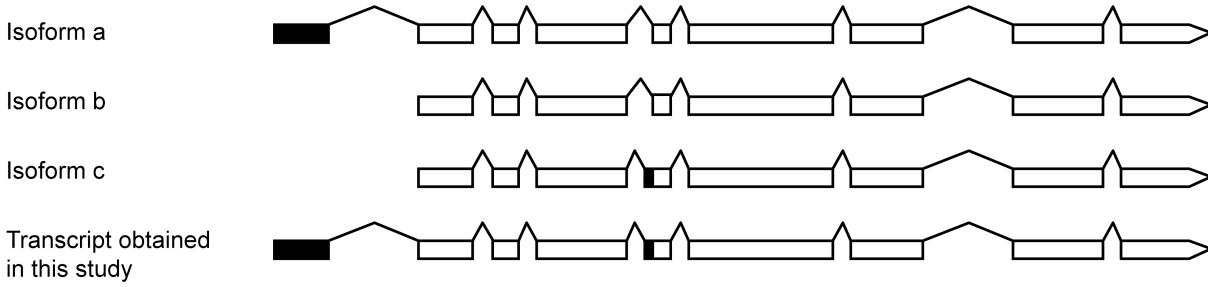

B

|                 |   |          |                    |            |                                   |           |            |            |        |         |           |        |            |     |     |     |     |     |     |     |     |     |     |     |     |     |     |     |     |   |
|-----------------|---|----------|--------------------|------------|-----------------------------------|-----------|------------|------------|--------|---------|-----------|--------|------------|-----|-----|-----|-----|-----|-----|-----|-----|-----|-----|-----|-----|-----|-----|-----|-----|---|
| mouse           | 1 | MAR---GE | RRRAAAAEAGARFLERAR | ---A       | AGRRDRGRAGGARGSASGAALAVVVLALAFGLS | GRVVLAWLR | ---V       | RRALTLHPAP | ---S   | ALPDS   | ---S      | SPAVAP | ----       | EL  | P   | W   | G   | T   | R   | F   | H   | V   | F   | G   | M   | K   | R   | S   | P   |   |
| CHO             | 1 | ---      | ---                | ---        | ---                               | ---       | ---        | ---        | ---    | ---     | ---       | ---    | ---        | --- | --- | --- | --- | --- | --- | --- | --- | --- | --- | --- | --- | --- | --- | --- | --- |   |
| human           | 1 | MAR---   | GE                 | RRRAVPAEGV | RTAERA                            | ARGGPR    | RRDRGRGGPR | STAGG      | VALVVL | SLALGMS | GRVVLAWYR | ---A   | ARRAVTLHSA | P   | --- | P   | V   | L   | D   | A   | S   | --- | S   | P   | A   | V   | A   | P   |     |   |
| D.melanogaster  | 1 | MARNTGSS | SGSTPA             | ASSSSSS    | AAAAA                             | AAAAA     | AAAAA      | NAKQ       | KQ     | RS      | FR        | SL     | SSNL       | L   | L   | D   | K   | W   | K   | T   | M   | I   | C   | V   | C   | L   | A   | I   | A   | S |
| A.thaliana      | 1 | MTG---   | ASRR               | SARGRIK    | SSLS                              | PGS       | DEGS       | AYPS       | IR     | R       | G         | K      | EL         | V   | S   | I   | G   | A   | F   | K   | T   | L   | L   | L   | L   | L   | L   | L   | L   |   |
| C.elegans agl-1 | 1 | ---      | ---                | ---        | ---                               | ---       | ---        | ---        | ---    | ---     | ---       | ---    | ---        | --- | --- | --- | --- | --- | --- | --- | --- | --- | --- | --- | --- | --- | --- | --- | --- |   |
| S.cerevisiae    | 1 | ---      | ---                | ---        | ---                               | ---       | ---        | ---        | ---    | ---     | ---       | ---    | ---        | --- | --- | --- | --- | --- | --- | --- | --- | --- | --- | --- | --- | --- | --- | --- | --- |   |

**Supplementary figure S1. (A)** The gene structure of *agl-1*. Three isoforms (a-c), composed of 8 or 9 exons, have been previously reported in WormBase. The black bars indicate the differences in exons between them. The transcript obtained in this study is a hybrid form of isoform a and isoform c. **(B)** Alignment of ER  $\alpha$ -glucosidase I from *C. elegans* and its homologues. The deduced amino acid sequence of *agl-1* from *C. elegans* is compared with human GCS1 (GenBank accession number AAI17253), Chinese hamster (CHO, BAC80205), mouse (AAD00906), *Drosophila melanogaster* (AAF48028), *Arabidopsis thaliana* (NP\_176916), and *Saccharomyces cerevisiae* (AAC49157). Positions of a mutation identified in CHO Lec23 cell (equivalent to S440F in human) and two mutations from a CDG IIb patient (R486T and F562L) are indicated by asterisks.

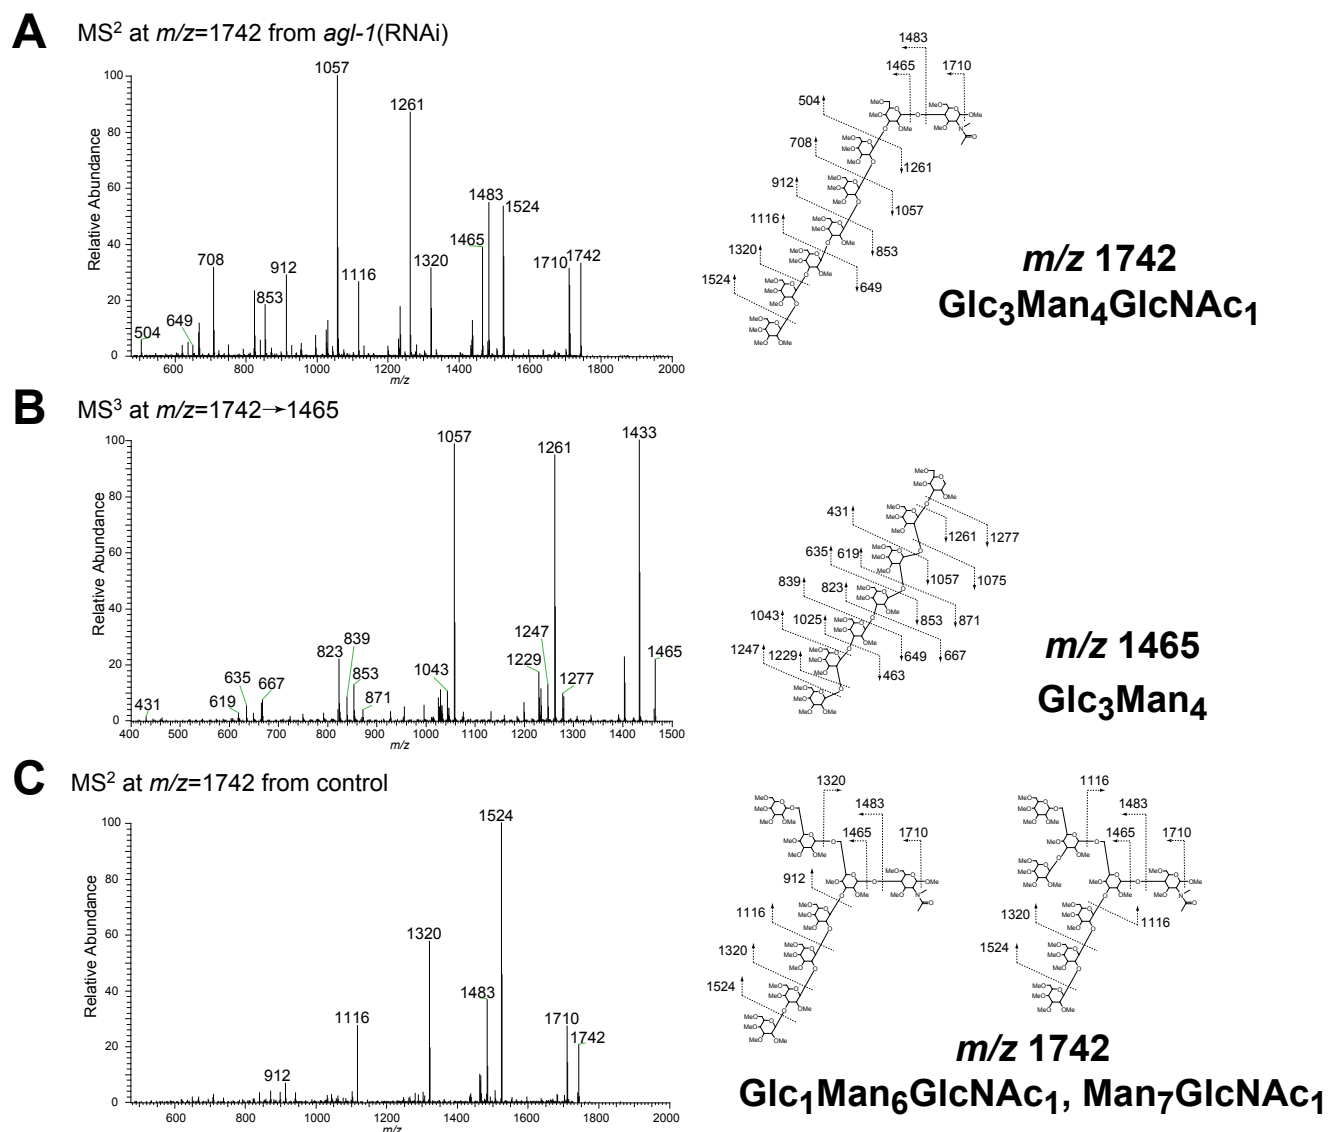

**Supplementary figure S2.** Fragmentation analysis by NSI-MS<sup>n</sup> of a FOS at  $m/z$  1742. (A) MS<sup>2</sup> fragmentation pattern of ion at  $m/z$  1742 from *agl-1*(RNAi) animals, which is deduced to be a linear structure of Hex<sub>7</sub>HexNAc<sub>1</sub> (Glc<sub>3</sub>Man<sub>4</sub>GlcNAc<sub>1</sub>) based on the detection of a diagnostic fragment ion of Hex<sub>6</sub> at  $m/z$  1261 (B-ion) and its counter ion at  $m/z$  504 (Y-ion). (B) When an ion at  $m/z$  1465 in (B) was subjected to MS<sup>3</sup>, a fragment ion at  $m/z$  1261 was seen again. This provides further evidence that the main component of Hex<sub>7</sub>HexNAc<sub>1</sub> from *agl-1*(RNAi) is a linear structure, Glc<sub>3</sub>Man<sub>4</sub>GlcNAc<sub>1</sub>. (C) MS<sup>2</sup> fragment pattern of ion at  $m/z$  1742 from control animals, which is deduced to be a branched structure of Hex<sub>7</sub>HexNAc<sub>1</sub> (Glc<sub>1</sub>Man<sub>6</sub>GlcNAc<sub>1</sub>/Man<sub>7</sub>GlcNAc<sub>1</sub>); note lack of 1261.

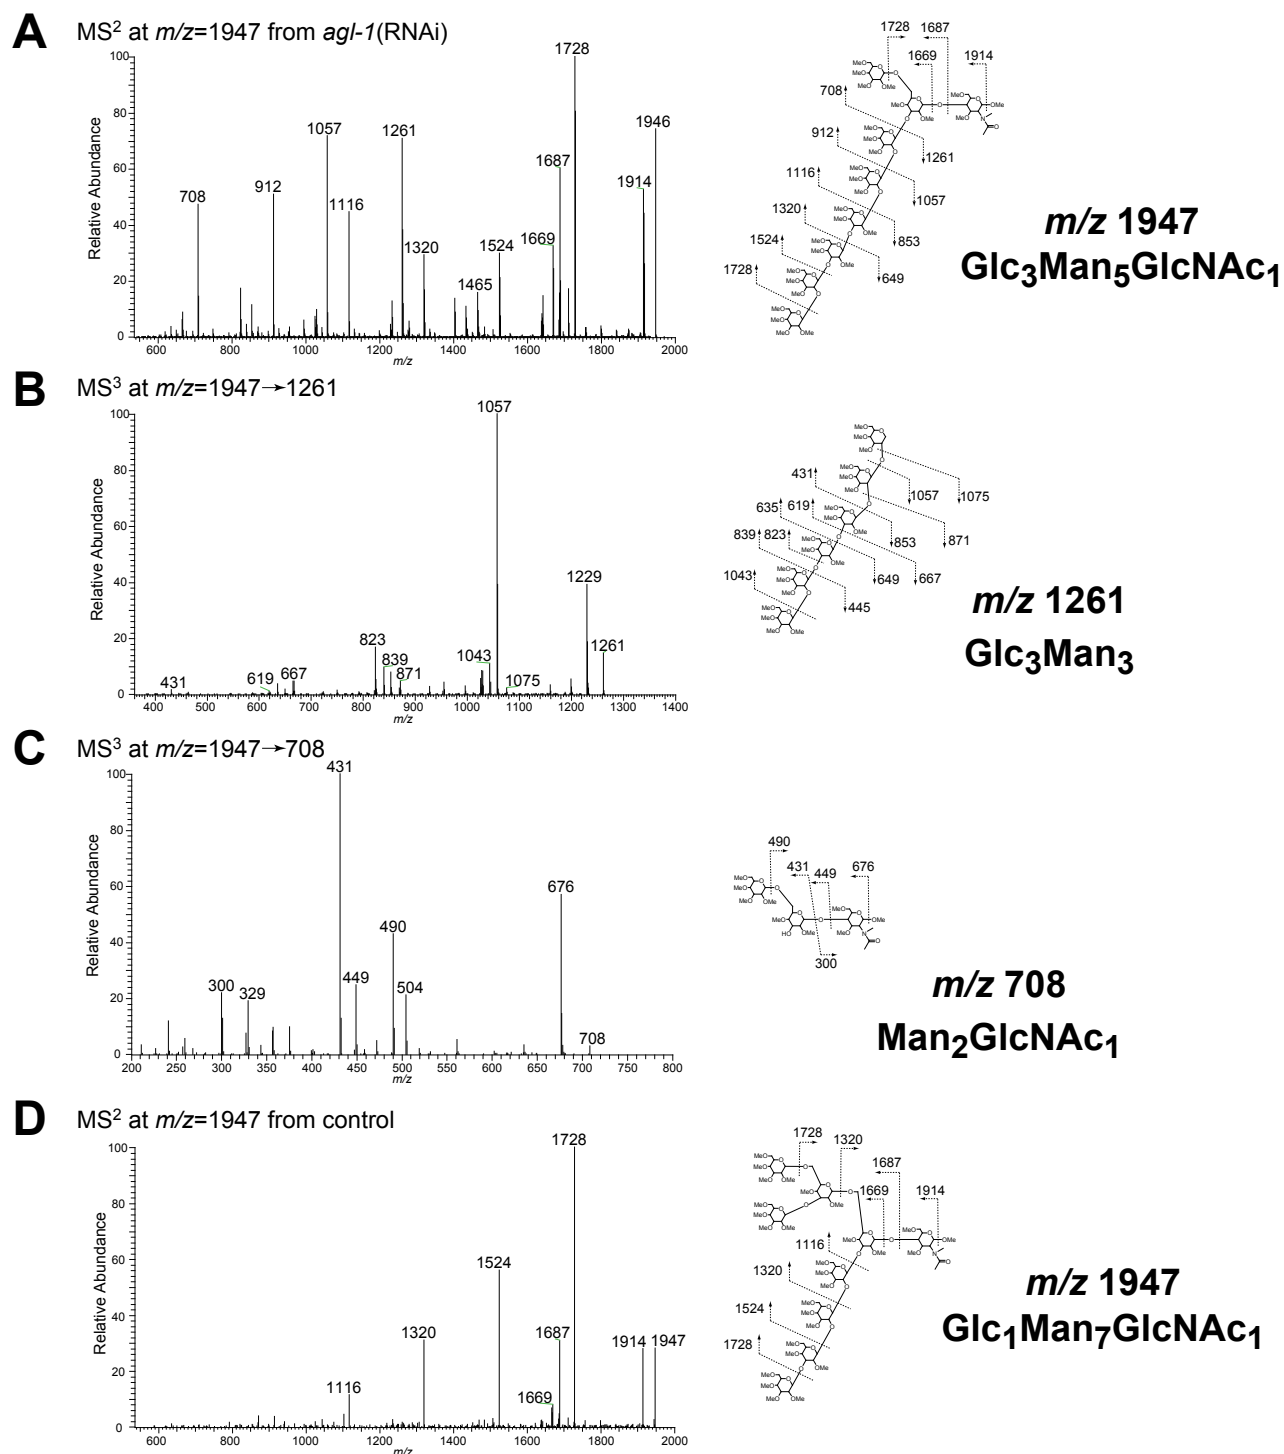

**Supplementary figure S3.** Fragmentation analysis by NSI-MS<sup>n</sup> of a FOS at  $m/z$  1947. (A) MS<sup>2</sup> fragmentation pattern of ion at  $m/z$  1947 from *agl-1*(RNAi) animals, which is deduced to be a triglycosylated structure of Hex<sub>8</sub>HexNAc<sub>1</sub> (Glc<sub>3</sub>Man<sub>5</sub>GlcNAc<sub>1</sub>) based on the diagnostic B-ion of a fragment of Hex<sub>6</sub> at  $m/z$  1261 and its counter Y-ion at  $m/z$  708. MS<sup>3</sup> fragment of an ion at  $m/z$  1261 and at  $m/z$  708 in (A) are shown in (B) and (C), respectively. (D) MS<sup>2</sup> fragmentation pattern of ion at  $m/z$  1947 from control animals. Glc<sub>1</sub>Man<sub>7</sub>GlcNAc<sub>1</sub> is a possible structure fitting the composition Hex<sub>8</sub>HexNAc<sub>1</sub> deduced from this fragmentation pattern.

Supplemental table I

*Permethylated N-glycans from C. elegans wild-type and agl-1 knock-down detected by NSI-MS-FT(Orbitrap) in the positive ion mode*

| Assignment        | Predicted m/z <sup>a</sup> |                       |                       | Observed m/z <sup>b</sup> |                       |                       | % of Total Profile <sup>c</sup> |                     |
|-------------------|----------------------------|-----------------------|-----------------------|---------------------------|-----------------------|-----------------------|---------------------------------|---------------------|
|                   | [M+Na] <sup>+</sup>        | [M+2Na] <sup>2+</sup> | [M+3Na] <sup>3+</sup> | [M+Na] <sup>+</sup>       | [M+2Na] <sup>2+</sup> | [M+3Na] <sup>3+</sup> | Control                         | <i>agl-1</i> (RNAi) |
| Hex3HexNAc2       | 1171.58                    | 597.29                | 405.85                | 1171.59                   | nd <sup>d</sup>       | nd                    | 15.5±2.9                        | 4.7±0.2             |
| Hex4HexNAc2       | 1375.68                    | 699.34                | 473.89                | 1375.69                   | 699.33                | nd                    | 2.9±0.4                         | 0.9±0.1             |
| Hex5HexNAc2       | 1579.78                    | 801.39                | 541.92                | 1579.79                   | 801.39                | nd                    | 9.5±0.7                         | 4.4±0.2             |
| Hex6HexNAc2       | 1783.88                    | 903.44                | 609.95                | 1783.89                   | 903.44                | nd                    | 4.6±0.2                         | 1.7±0.1             |
| Hex7HexNAc2       | 1987.98                    | 1005.49               | 677.99                | 1988.99                   | 1005.49               | nd                    | 5.2±0.4                         | 1.8±0.1             |
| Hex8HexNAc2       | 2192.08                    | 1107.54               | 746.02                | ol <sup>e</sup>           | 1108.04               | nd                    | 8.2±0.9                         | 2.1±0.1             |
| Hex9HexNAc2       | 2396.18                    | 1209.59               | 814.05                | ol                        | 1210.09               | 814.39                | 17.5±1.5                        | 7.5±0.1             |
| Hex10HexNAc2      | 2600.28                    | 1311.64               | 882.09                | ol                        | 1312.14               | 882.42                | 3.3±0.6                         | 16.7±0.1            |
| Hex11HexNAc2      | 2804.38                    | 1413.69               | 950.12                | ol                        | 1414.19               | 950.46                | 0.1±0.0                         | 24.4±0.1            |
| Hex12HexNAc2      | 3008.48                    | 1515.74               | 1018.15               | ol                        | 1516.24               | 1018.49               | 0.0±0.0                         | 9.9±0.4             |
| Hex8HexNAc2dHex1  | 2366.17                    | 1194.58               | 804.05                | ol                        | 1195.58               | nd                    | 0.3±0.1                         | 0.1±0.0             |
| Hex9HexNAc2dHex1  | 2570.27                    | 1296.63               | 872.08                | ol                        | 1297.13               | nd                    | 0.0±0.0                         | 0.2±0.0             |
| Hex10HexNAc2dHex1 | 2774.37                    | 1398.68               | 940.12                | ol                        | 1399.18               | 940.45                | 0.3±0.2                         | 2.1±0.1             |
| Hex11HexNAc2dHex1 | 2978.47                    | 1500.73               | 1008.15               | ol                        | 1501.23               | 1008.49               | 0.0±0.0                         | 8.1±0.1             |
| Hex12HexNAc2dHex1 | 3182.57                    | 1602.78               | 1076.18               | ol                        | 1603.78               | 1076.52               | 0.1±0.0                         | 0.1±0.0             |
| Hex2HexNAc2dHex1  | 1141.57                    | 582.28                | 395.85                | 1141.58                   | nd                    | nd                    | 0.9±0.2                         | 0.5±0.1             |
| Hex3HexNAc2dHex1  | 1345.67                    | 684.33                | 463.88                | 1345.68                   | 684.33                | nd                    | 8.3±1.0                         | 4.4±0.2             |
| Hex4HexNAc2dHex1  | 1549.77                    | 786.38                | 531.92                | 1549.78                   | 786.38                | nd                    | 1.6±0.2                         | 0.1±0.0             |
| Hex5HexNAc2dHex1  | 1753.87                    | 888.43                | 599.95                | 1753.88                   | 888.43                | nd                    | 0.9±0.1                         | 0.1±0.0             |
| Hex3HexNAc2dHex2  | 1519.76                    | 771.38                | 521.91                | 1519.76                   | 771.4                 | nd                    | 2.2±0.3                         | 1.6±0.3             |
| Hex4HexNAc2dHex2  | 1723.86                    | 873.43                | 589.95                | 1723.87                   | 873.43                | nd                    | 2.7±0.2                         | 0.9±0.0             |
| Hex5HexNAc2dHex2  | 1927.96                    | 975.48                | 657.98                | 1927.97                   | 975.48                | nd                    | 2.9±0.4                         | 0.7±0.1             |
| Hex6HexNAc2dHex2  | 2132.06                    | 1077.53               | 726.01                | ol                        | 1077.53               | nd                    | 0.6±0.2                         | 0.2±0.0             |
| Hex4HexNAc2dHex3  | 1897.95                    | 960.47                | 647.98                | 1897.95                   | 960.47                | nd                    | 1.0±0.5                         | 0.3±0.1             |
| Hex5HexNAc2dHex3  | 2102.05                    | 1062.52               | 716.01                | ol                        | 1062.52               | nd                    | 1.7±0.5                         | 0.8±0.0             |
| Hex6HexNAc2dHex3  | 2306.15                    | 1164.57               | 784.04                | ol                        | 1164.57               | nd                    | 1.3±0.4                         | 0.7±0.0             |
| Hex7HexNAc2dHex3  | 2510.25                    | 1266.62               | 852.08                | ol                        | 1266.62               | nd                    | 0.7±0.3                         | 0.4±0.0             |
| Hex4HexNAc2dHex4  | 2072.04                    | 1047.52               | 706.01                | ol                        | 1048.02               | nd                    | 0.4±0.2                         | 0.3±0.0             |
| Hex5HexNAc2dHex4  | 2276.14                    | 1149.56               | 774.04                | ol                        | 1150.07               | nd                    | 0.7±0.4                         | 0.6±0.0             |
| Hex6HexNAc2dHex4  | 2480.24                    | 1251.61               | 842.07                | ol                        | 1252.12               | nd                    | 0.9±0.4                         | 0.9±0.1             |
| Hex7HexNAc2dHex4  | 2684.34                    | 1353.66               | 910.11                | ol                        | 1354.17               | nd                    | 0.8±0.2                         | 0.8±0.0             |
| Hex3HexNAc3       | 1416.71                    | 719.85                | 487.56                | 1416.71                   | 719.85                | nd                    | 2.4±0.4                         | 1.0±0.1             |
| Hex4HexNAc3       | 1620.81                    | 821.90                | 555.60                | 1620.81                   | nd                    | nd                    | 0.1±0.0                         | 0.0±0.0             |
| Hex3HexNAc3dHex1  | 1590.80                    | 806.89                | 545.59                | 1590.81                   | nd                    | nd                    | 0.5±0.1                         | 0.1±0.0             |
| Hex3HexNAc4       | 1661.84                    | 842.41                | 569.27                | 1661.84                   | 842.41                | nd                    | 1.2±0.1                         | 0.3±0.1             |
| Hex3HexNAc4dHex1  | 1835.93                    | 929.46                | 627.30                | 1835.92                   | 929.46                | nd                    | 0.7±0.0                         | 0.4±0.1             |

a, Monoisotopic mass

b, Most intense ion within detected isotopic peaks.

c, Percentages of total identified glycan ions. Values are shown as mean ± standard error for three independent samples.

d, Not detected.

e, Over limit ( $m/z > 2000$ )

Supplemental table II

*Permethylated free oligosaccharides (FOS) from C. elegans wild-type and agl-1 knock-down detected by NSI-MS-FT (Orbitrap) in the positive ion mode*

| Assignment      | Predicted m/z <sup>a</sup> |                       |                       | Observed m/z <sup>b</sup> |                       |                       | % of Total Profile <sup>c</sup> |                     |
|-----------------|----------------------------|-----------------------|-----------------------|---------------------------|-----------------------|-----------------------|---------------------------------|---------------------|
|                 | [M+Na] <sup>+</sup>        | [M+2Na] <sup>2+</sup> | [M+3Na] <sup>3+</sup> | [M+Na] <sup>+</sup>       | [M+2Na] <sup>2+</sup> | [M+3Na] <sup>3+</sup> | Control                         | <i>agl-1</i> (RNAi) |
| FOS-GN1 species |                            |                       |                       |                           |                       |                       |                                 |                     |
| Hex2HexNAc1     | 722.36                     | 372.67                | 256.11                | 722.36                    | nd <sup>d</sup>       | nd                    | 30.5±3.5                        | 10.5±2.8            |
| Hex3HexNAc1     | 926.46                     | 474.72                | 324.15                | 926.46                    | 474.72                | nd                    | 22.3±1.1                        | 9.3±1.4             |
| Hex4HexNAc1     | 1130.56                    | 576.77                | 392.18                | 1130.56                   | 576.77                | nd                    | 9.2±1.4                         | 6.6±1.6             |
| Hex5HexNAc1     | 1334.66                    | 678.82                | 460.21                | 1334.66                   | 678.82                | nd                    | 13.1±0.8                        | 9.9±1.0             |
| Hex6HexNAc1     | 1538.76                    | 780.87                | 528.25                | 1538.76                   | 780.87                | nd                    | 7.3±0.6                         | 8.9±2.5             |
| Hex7HexNAc1     | 1742.86                    | 882.92                | 596.28                | 1742.86                   | 882.92                | nd                    | 3.6±0.9                         | 20.7±2.1            |
| Hex8HexNAc1     | 1946.96                    | 984.97                | 664.31                | 1946.96                   | 984.97                | nd                    | 1.9±0.6                         | 18.8±3.4            |
| Hex9HexNAc1     | 2151.06                    | 1087.02               | 732.35                | ol <sup>e</sup>           | 1087.52               | 732.68                | 0.7±0.5                         | 3.3±0.2             |
| Hex10HexNAc1    | 2355.16                    | 1189.07               | 800.38                | ol                        | 1189.58               | 800.71                | 0.1±0.1                         | 2.8±1.2             |
| Hex11HexNAc1    | 2559.26                    | 1291.12               | 868.41                | ol                        | 1291.62               | 868.75                | 0.1±0.1                         | 0.9±0.5             |
| Hex12HexNAc1    | 2763.36                    | 1393.17               | 936.45                | ol                        | nd                    | 936.92                | 0.0±0.0                         | 0.2±0.2             |
| FOS-GN2 species |                            |                       |                       |                           |                       |                       |                                 |                     |
| Hex2HexNAc2     | 967.48                     | 495.24                | 337.82                | 967.48                    | 495.24                | nd                    | 2.8±0.2                         | 1.4±0.1             |
| Hex3HexNAc2     | 1171.58                    | 597.29                | 405.85                | 1171.58                   | 597.29                | nd                    | 3.8±0.5                         | 1.8±0.2             |
| Hex4HexNAc2     | 1375.68                    | 699.34                | 473.89                | 1375.68                   | 699.34                | nd                    | 1.8±0.3                         | 1.0±0.1             |
| Hex5HexNAc2     | 1579.78                    | 801.39                | 541.92                | 1579.78                   | 801.39                | nd                    | 0.8±0.5                         | 0.6±0.3             |
| Hex6HexNAc2     | 1783.88                    | 903.44                | 609.95                | 1783.89                   | 903.44                | nd                    | 1.3±0.8                         | 0.6±0.2             |
| Hex7HexNAc2     | 1987.98                    | 1005.49               | 677.99                | 1987.98                   | 1005.99               | 677.99                | 0.4±0.3                         | 1.6±0.6             |
| Hex8HexNAc2     | 2192.08                    | 1107.54               | 746.02                | ol                        | 1107.54               | 746.02                | 0.3±0.4                         | 1.1±0.4             |
| Hex9HexNAc2     | 2396.18                    | 1209.59               | 814.05                | ol                        | 1209.57               | nd                    | 0.1±0.1                         | 0.2±0.1             |

a, Monoisotopic mass

b, Most intense ion within detected isotopic peaks.

c, Percentages of total identified glycan ions. Values are shown as mean ± standard error for three independent samples.

d, Not detected.

e, Over limit ( $m/z > 2000$ )
